# Supplementary material
Source: PubMed Central journal article supplement (PMC1458797)

**A****Day 6**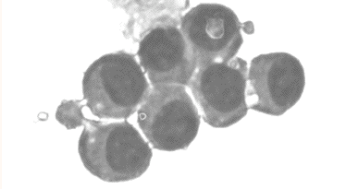**Day 10**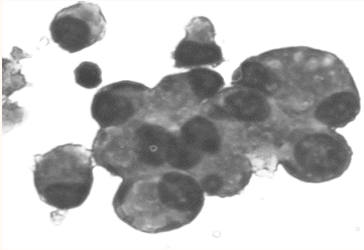**Day 12**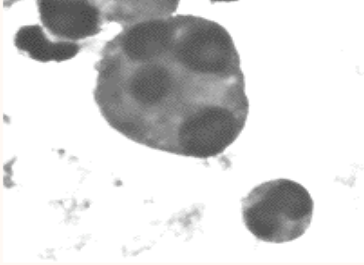**Day 14**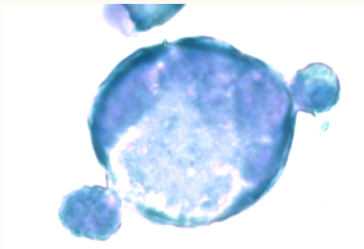**B****D+ 10 Isotype**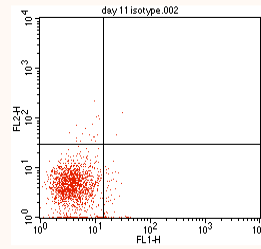**D+10 CD41**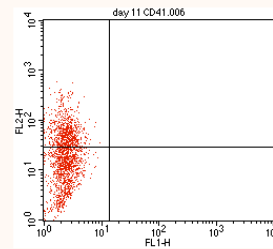**D+10 CD61**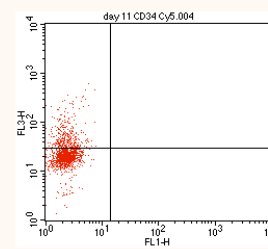**D+10 CD34/CD41**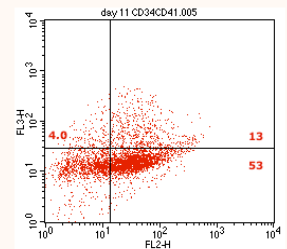**D+ 14 Isotype**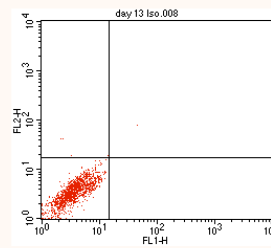**D+14 CD41**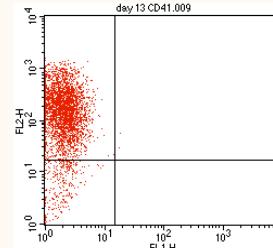**D+14 CD61**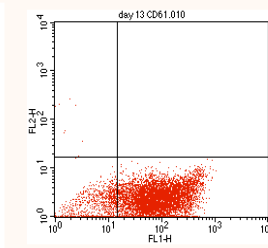**D+14 CD41/CD61**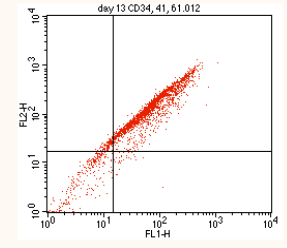**D+ 16 Isotype**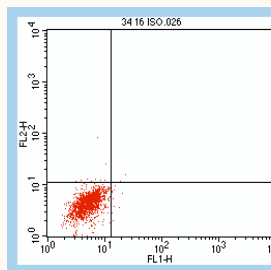**D+16 CD41**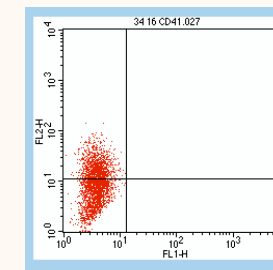**D+16 CD61**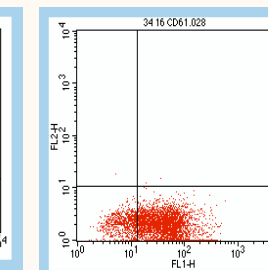**D+16 CD42**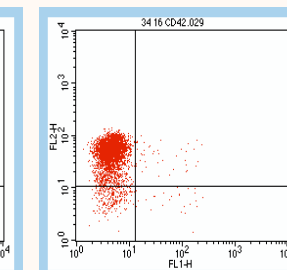

Supplement: pnas_0600587103_1.pdf [file pnas_0600587103_1.pdf]

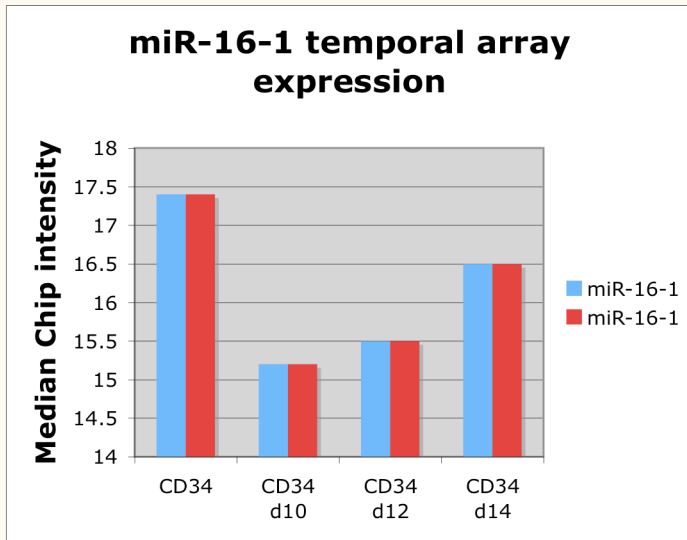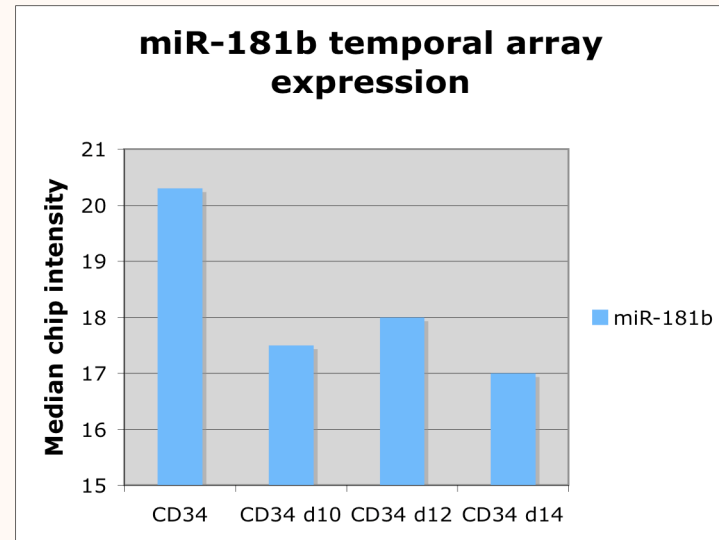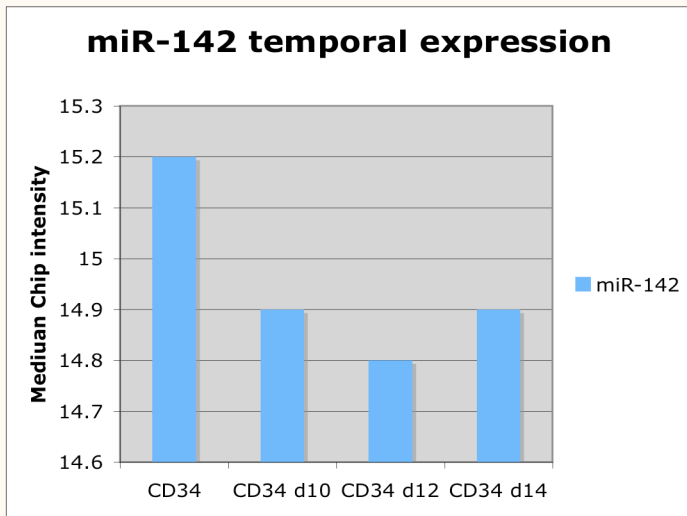

Supplement: pnas_0600587103_2.pdf [file pnas_0600587103_2.pdf]

### miR-17/20 expression in differentiated megakaryocytes

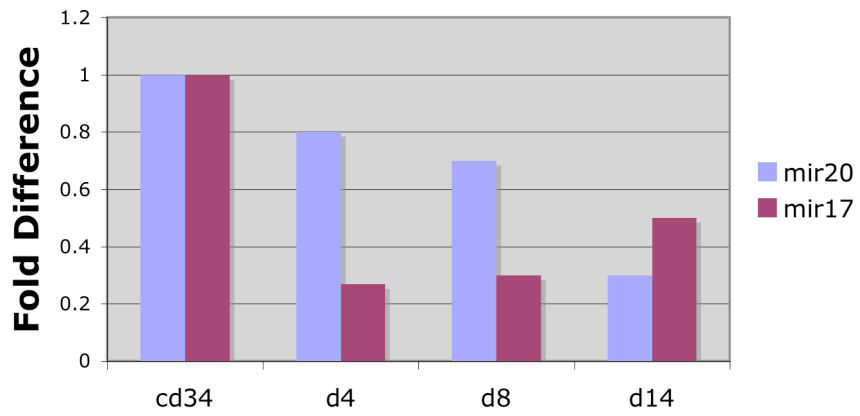

Supplement: pnas_0600587103_3.pdf [file pnas_0600587103_3.pdf]

miR-130a Scramble

miR-130a

U6

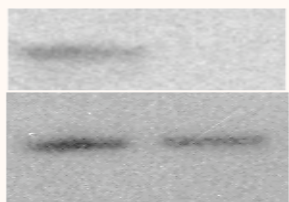

Supplement: pnas_0600587103_4.pdf [file pnas_0600587103_4.pdf]

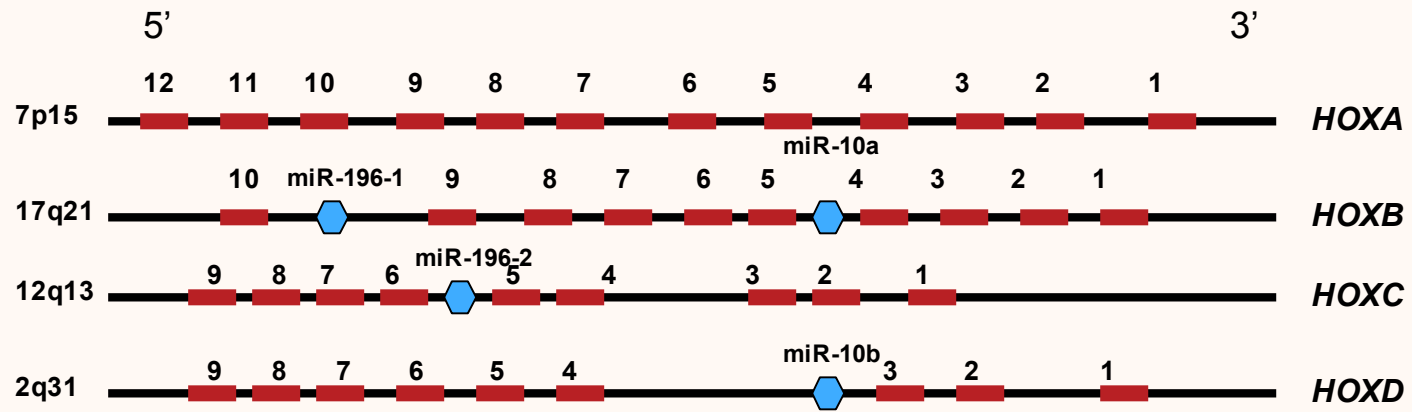

HOX genes

microRNAs

Supplement: pnas_0600587103_5.pdf [file pnas_0600587103_5.pdf]

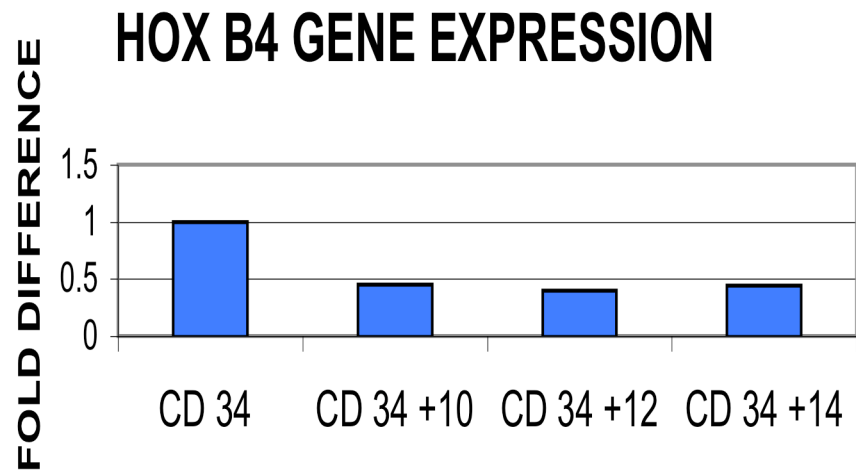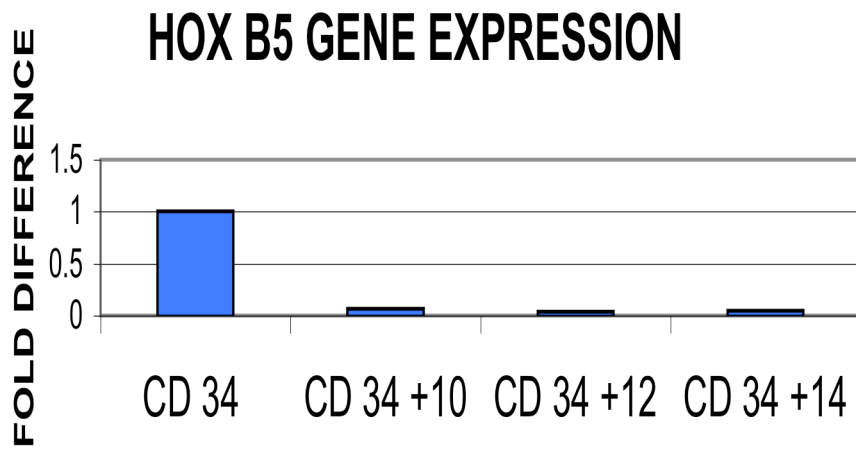

Supplement: pnas_0600587103_6.pdf [file pnas_0600587103_6.pdf]

## miRNA expression in AMKL cell lines

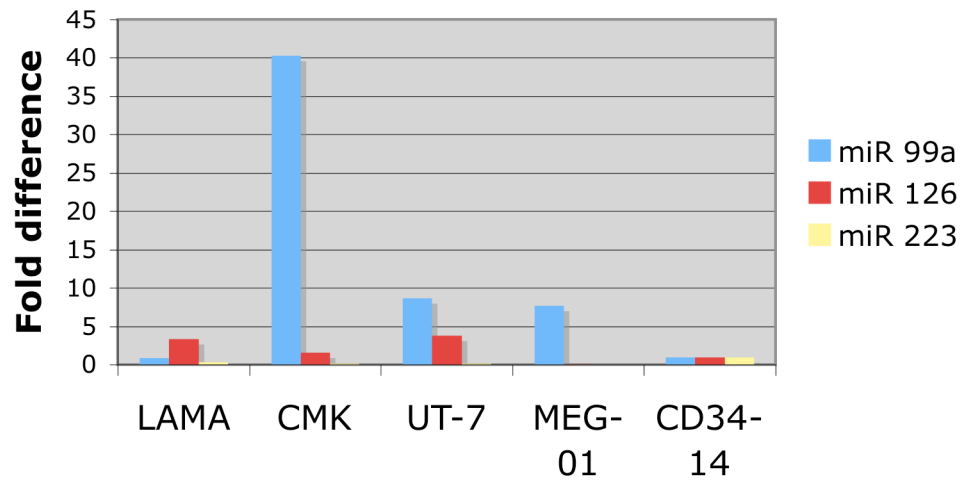

Supplement: pnas_0600587103_7.pdf [file pnas_0600587103_7.pdf]
